# Supplementary material for: Experience Modulates the Reproductive Response to Heat Stress in C. elegans via Multiple Physiological Processes
Source: PubMed Central journal article supplement (PMC4699941; doi:10.1371/journal.pone.0145925), 2015-12-29
Supplement: pone.0145925.s006.pdf [file pone.0145925.s006.pdf]

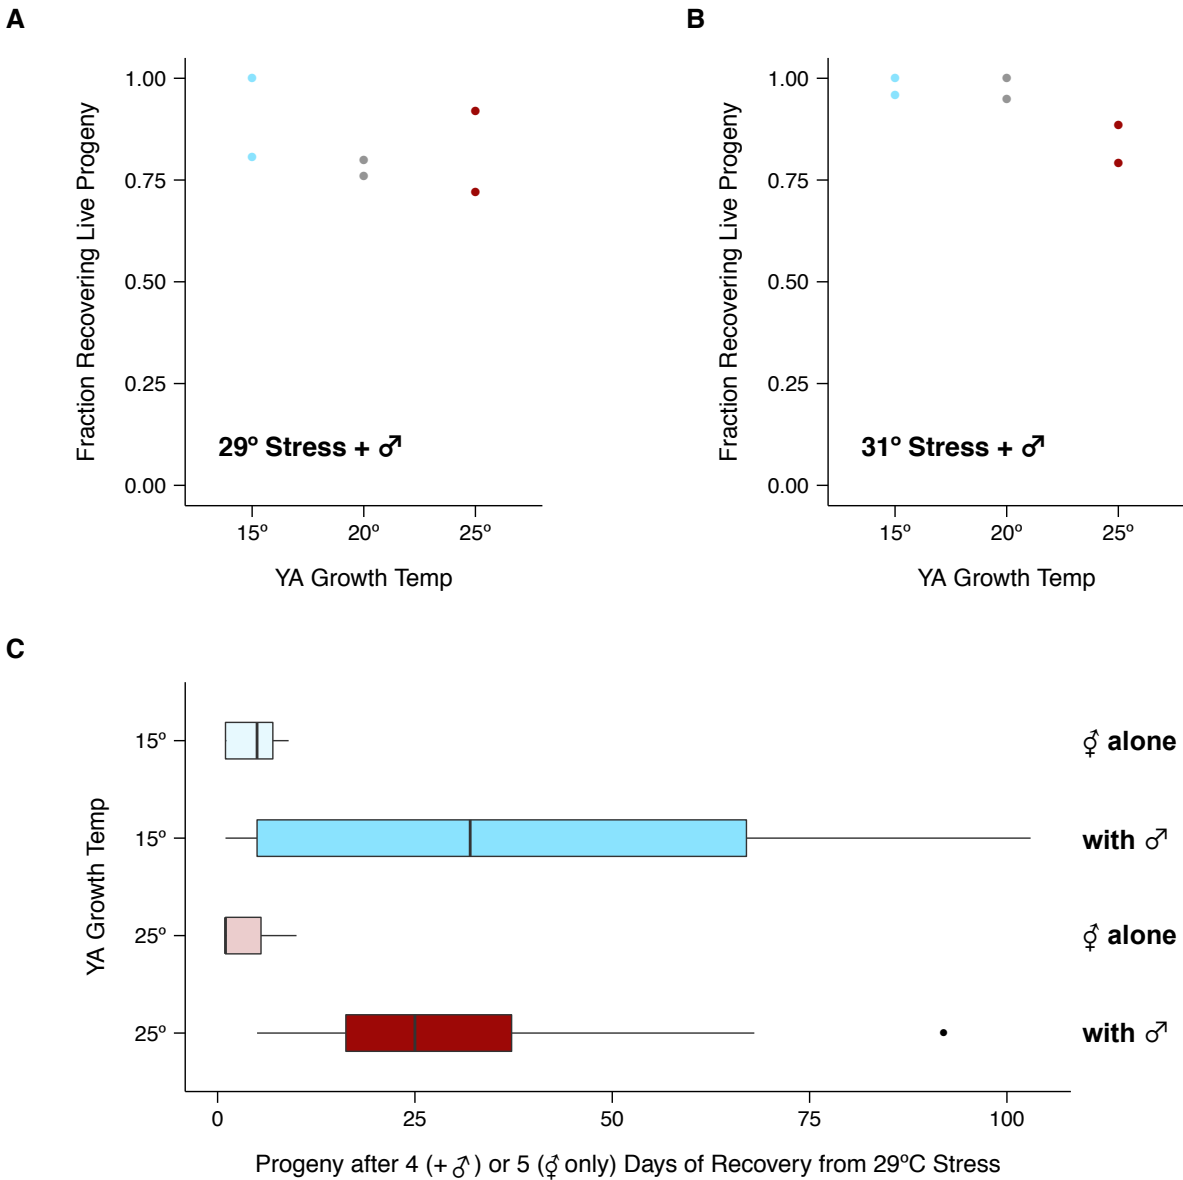

**S6 Fig. Severe heat stress causes extensive sperm damage.** (A, B) Individual trials (each with  $n = 25$ ) for the recovery results reported in Fig. 5A and 5B. (C) Brood sizes of recovered individuals raised at 15°C (blue) or 25°C (red) increased when fresh males were added during recovery from stress at 29°C. Black lines represent median values. Box hinges represent the first and third quartiles of the data. Each whisker extends to the furthest data point within  $1.5 \times IQR$  (inter-quartile range) of its nearest hinge.
