# Supplementary material for: Experience Modulates the Reproductive Response to Heat Stress in C. elegans via Multiple Physiological Processes
Source: PubMed Central journal article supplement (PMC4699941; doi:10.1371/journal.pone.0145925), 2015-12-29
Supplement: pone.0145925.s007.pdf [file pone.0145925.s007.pdf]

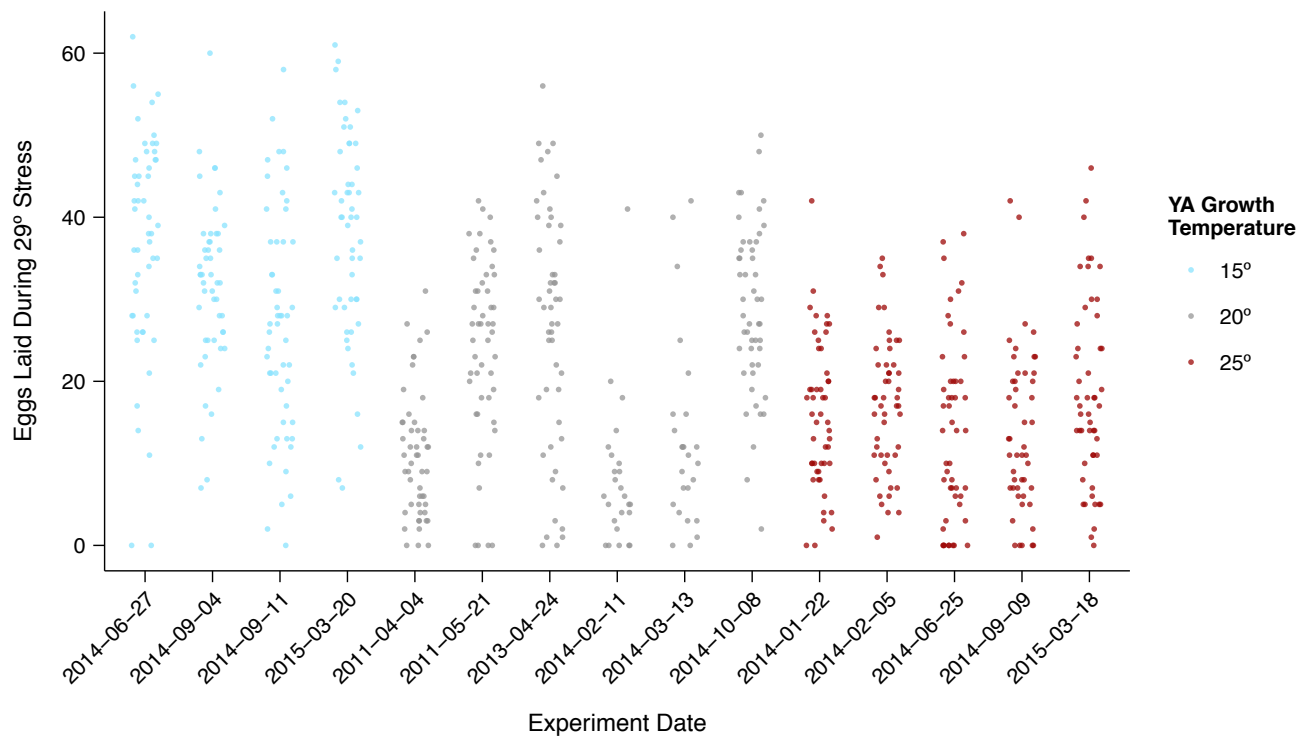

**S7 Fig. Egg-laying during 29°C heat stress.** Individual trials (each with  $n = 25$  or  $n = 50$ ) for the egg-laying results reported in Fig. 6A. Each point represents the number of eggs laid by one worm. See S3 Table for raw data.
