# Supplementary material for: Experience Modulates the Reproductive Response to Heat Stress in C. elegans via Multiple Physiological Processes
Source: PubMed Central journal article supplement (PMC4699941; doi:10.1371/journal.pone.0145925), 2015-12-29
Supplement: pone.0145925.s008.pdf [file pone.0145925.s008.pdf]

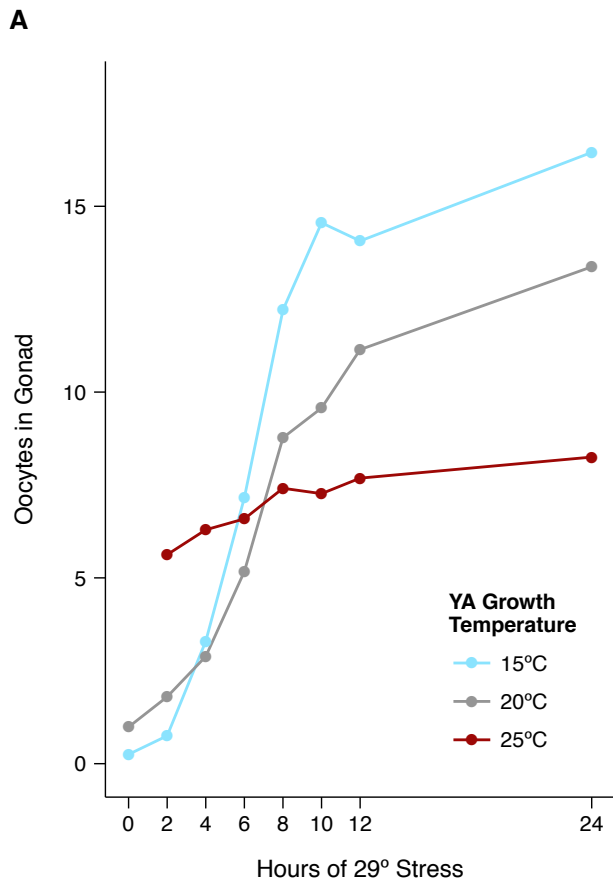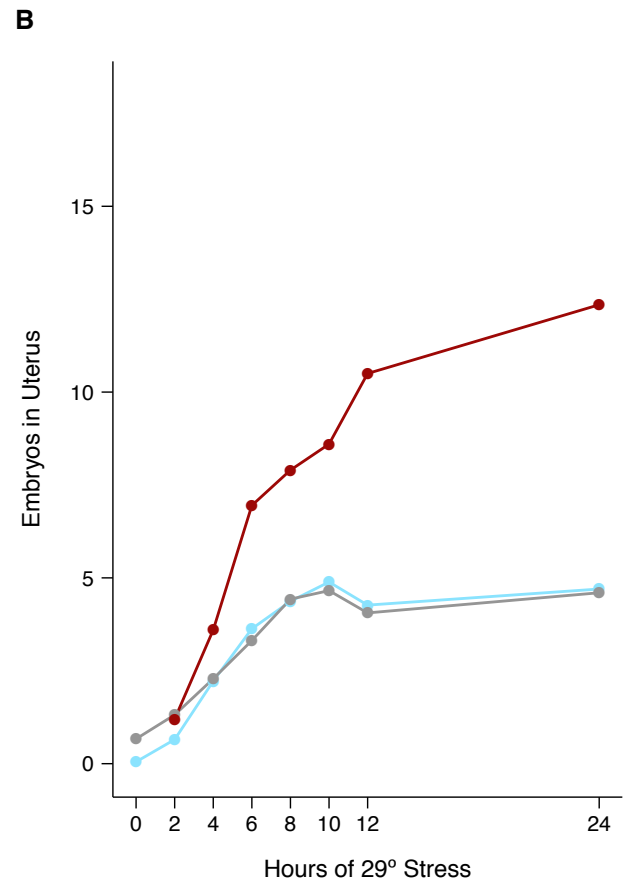

**S8 Fig. Gonad dynamics during 29°C heat stress.** Lines show the accumulation of (A) oocytes in the gonad and (B) eggs in the uterus during heat stress at 29°C. See S3 Table for raw data.
