# Supplementary material for: Experience Modulates the Reproductive Response to Heat Stress in C. elegans via Multiple Physiological Processes
Source: PubMed Central journal article supplement (PMC4699941; doi:10.1371/journal.pone.0145925), 2015-12-29
Supplement: pone.0145925.s009.pdf [file pone.0145925.s009.pdf]

**A**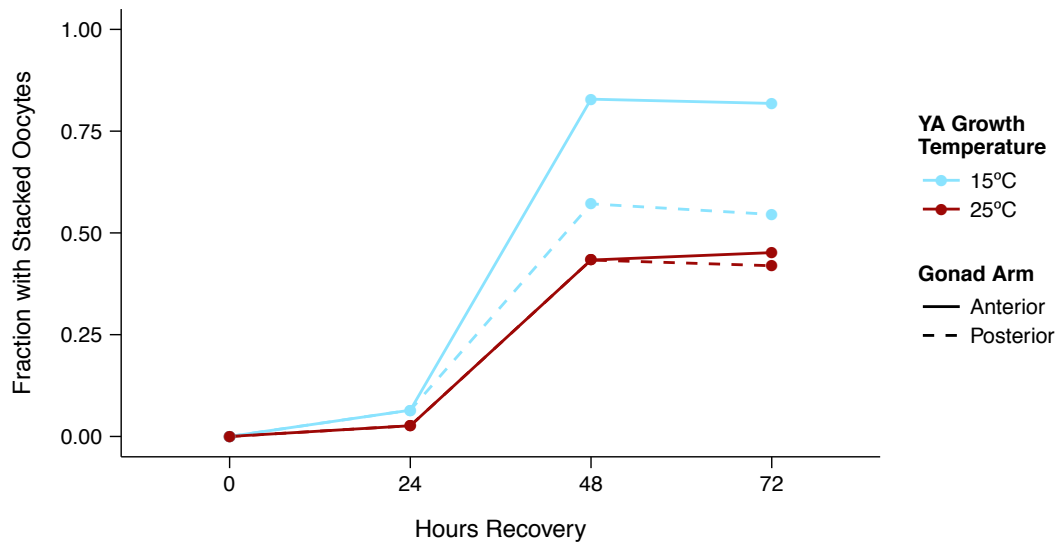**B**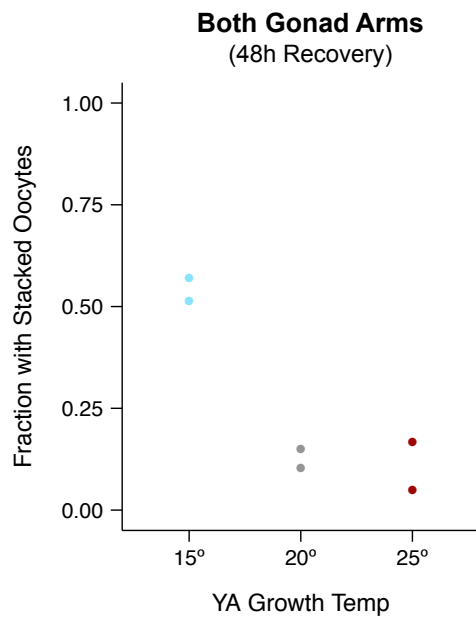**C**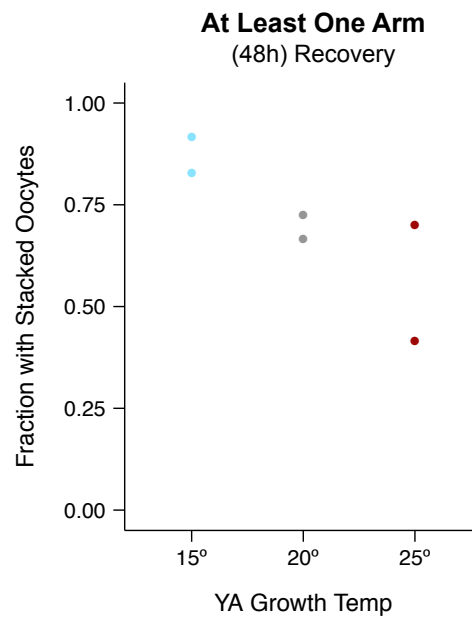

**S9 Fig. Gonad damage after 29°C heat stress.** (A) Stacking over time in each gonad arm during recovery from 29°C heat stress ( $30 \leq n \leq 38$  for each time point). (B, C) Individual trials (each with  $30 \leq n \leq 41$ ) for the stacking results reported in Fig. 6. See S3 Table for raw data.
