# Supplementary material for: Experience Modulates the Reproductive Response to Heat Stress in C. elegans via Multiple Physiological Processes
Source: PubMed Central journal article supplement (PMC4699941; doi:10.1371/journal.pone.0145925), 2015-12-29
Supplement: pone.0145925.s012.pdf [file pone.0145925.s012.pdf]

**A**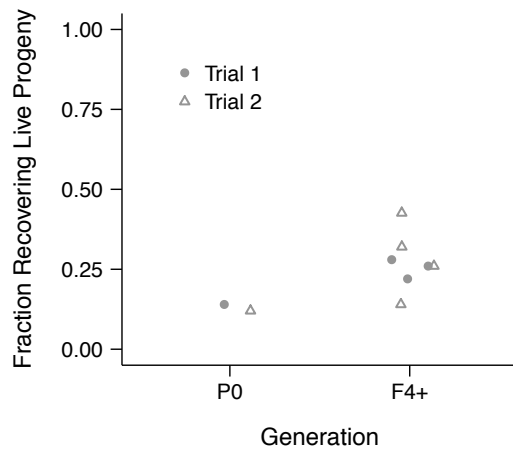**B**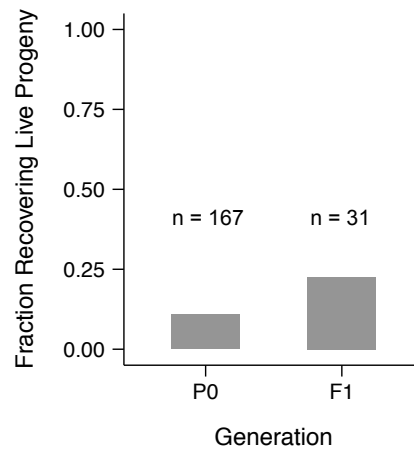**S12 Fig. Hormesis in the descendants of worms raised at 20°C and stressed at 29°C.**

(A) Individual experiments (each with  $n = 50$ ) reported collectively in Fig. 8A. (B) Results of a separate experiment in which the F1 offspring of stressed parents were themselves stressed at 29°C (binomial exact test  $p = 0.044$ ). See S3 Table for raw data.
