# Supplementary material for: Experience Modulates the Reproductive Response to Heat Stress in C. elegans via Multiple Physiological Processes
Source: PLoS One. 2015 Dec 29;10(12):e0145925. doi: 10.1371/journal.pone.0145925 (PMC4699941; doi:10.1371/journal.pone.0145925)
Supplement: S1 Table — (XLSX) [file pone.0145925.s013.xlsx]

## Sheet: 25º
S1 Table. Raw data for developmental timing at 25ºC (presented in Figure 1).
Date	Temp	Age	Num	Stage	Lethargus	Oocytes_Ant	Embryos	Oocytes_Post
2012-07-19	25	38	1	YA		0	0	0
2012-07-19	25	38	2	YA		0	0	1
2012-07-19	25	38	3	YA		0	0	0
2012-07-19	25	38	4	YA		2	0	1
2012-07-19	25	38	5	YA		1	0	0
2012-07-19	25	38	6	YA		0	0	0
2012-07-19	25	38	7	YA			0	0
2012-07-19	25	38	8	YA		0	0	0
2012-07-19	25	38	9	YA		0	0	0
2012-07-19	25	38	10	YA		2	0	0
2012-07-19	25	38	11	YA		2	0	1
2012-07-19	25	38	12	YA		0	0	0
2012-07-19	25	38	13	YA		0
2012-07-19	25	38	14	YA		0	0	0
2012-07-19	25	38	15	YA		0	0	0
2012-07-19	25	38	16	YA		0	0	0
2012-07-19	25	38	17	YA		0	0	0
2012-07-19	25	38	18	YA		0
2012-07-19	25	38	19	YA		0	0	0
2012-07-19	25	38	20	YA		2	0	2
2012-07-19	25	38	21	YA			0	0
2012-07-19	25	38	22	YA		1	0	0
2012-07-19	25	38	23	YA		0	0	0
2012-07-19	25	38	24	YA		0	0	0
2012-07-19	25	38	25	YA		0	0	0
2012-07-19	25	38	26	YA		0	0	0
2012-07-19	25	38	27	YA		0	0	0
2012-07-19	25	39	1	YA		1	0	0
2012-07-19	25	39	2	YA		3	0	2
2012-07-19	25	39	3	YA		2	0	0
2012-07-19	25	39	4	YA		2	0	0
2012-07-19	25	39	5	YA			0	0
2012-07-19	25	39	6	YA			0	0
2012-07-19	25	39	7	YA		2	0	0
2012-07-19	25	39	8	YA			0	2
2012-07-19	25	39	9	YA		2	0	2
2012-07-19	25	39	10	YA		2	0	1
2012-07-19	25	39	11	YA		0	0	0
2012-07-19	25	39	12	YA		2	0	1
2012-07-19	25	39	13	YA		1	0	0
2012-07-19	25	39	14	YA			0	0
2012-07-19	25	39	15	YA		1	0	0
2012-07-19	25	39	16	YA		0	0	0
2012-07-19	25	39	17	YA		2	0	2
2012-07-19	25	39	18	YA		2	0	0
2012-07-19	25	39	19	YA		2	0	2
2012-07-19	25	39	20	YA		1	0	0
2012-07-19	25	39	21	YA		3	0	2
2012-07-19	25	39	22	YA		2	0	3
2012-07-19	25	39	23	YA		0	0
2012-07-19	25	39	24	YA		3	0
2012-07-19	25	39	25	YA		2	0	0
2012-07-19	25	39	26	YA		1	0	0
2012-07-19	25	39	27	YA		3	0	2
2012-07-19	25	39	28	YA		3	0	1
2012-07-19	25	40	1	YA		2	0	0
2012-07-19	25	40	2	YA		3	0
2012-07-19	25	40	3	YA		2	0	2
2012-07-19	25	40	4	YA		3	0	3
2012-07-19	25	40	5	YA				0
2012-07-19	25	40	6	YA		3	1	2
2012-07-19	25	40	7	YA		2	0	2
2012-07-19	25	40	8	YA		3	0	1
2012-07-19	25	40	9	YA		3	1	2
2012-07-19	25	40	10	YA				2
2012-07-19	25	40	11	YA		3
2012-07-19	25	40	12	YA		3	1	3
2012-07-19	25	40	13	YA		1	0	1
2012-07-19	25	40	14	YA		2	1	2
2012-07-19	25	40	15	YA		2	0	2
2012-07-19	25	40	16	YA		0	0	0
2012-07-19	25	40	17	YA		4
2012-07-19	25	40	18	YA		1	0	2
2012-07-19	25	40	19	YA		2	1	2
2012-07-19	25	40	20	YA		3	0	2
2012-07-19	25	40	21	YA		1	0	0
2012-07-19	25	40	22	YA		2	2	2
2012-07-19	25	40	23	YA		3	0	2
2012-07-19	25	40	24	YA		2	1	3
2012-07-19	25	40	25	YA		2	3	2
2012-07-19	25	40	26	YA				2
2012-07-19	25	40	27	YA		2	2	2
2012-07-19	25	40	28	YA		2	2	3
2012-07-19	25	40	29	YA		2	0	2
2012-07-19	25	41	1	YA		4	3	2
2012-07-19	25	41	2	YA		3	0	2
2012-07-19	25	41	3	YA		3	3	3
2012-07-19	25	41	4	YA		3	2	0
2012-07-19	25	41	5	YA		3	3	2
2012-07-19	25	41	6	YA		2	1	3
2012-07-19	25	41	7	YA		4
2012-07-19	25	41	8	YA		3	1	1
2012-07-19	25	41	9	YA		3	3	2
2012-07-19	25	41	10	YA		2	1	3
2012-07-19	25	41	11	YA		4	0	3
2012-07-19	25	41	12	YA		2		3
2012-07-19	25	41	13	YA		3	0	2
2012-07-19	25	41	14	YA		3	2	4
2012-07-19	25	41	15	YA		4	0	3
2012-07-19	25	41	16	YA		0	0	0
2012-07-19	25	41	17	YA		4	0	3
2012-07-19	25	41	18	YA		3	3	2
2012-07-19	25	41	19	YA		4	4	3
2012-07-19	25	41	20	YA		3	2	2
2012-07-19	25	41	21	YA		3	2	2
2012-07-19	25	41	22	YA		2	0	2
2012-07-19	25	41	23	YA		3	0	3
2012-07-19	25	41	24	YA		2	0	0
2012-07-19	25	41	25	YA		2	0	2
2012-07-19	25	41	26	YA		2	1	2
2012-07-19	25	41	27	YA		2	1	2
2012-07-19	25	41	28	YA		3	0	0
2012-07-19	25	41	29	YA		2
2012-07-19	25	41	30	YA		3	1	2
2013-04-03	25	33	1	L4	Y
2013-04-03	25	33	2	L4	Y
2013-04-03	25	33	3	L4	Y
2013-04-03	25	33	4	L4	Y
2013-04-03	25	33	5	L4	Y
2013-04-03	25	33	6	L4	Y
2013-04-03	25	33	7	L4	Y
2013-04-03	25	33	8	L4	Y
2013-04-03	25	33	9	L4	Y
2013-04-03	25	33	10	L4	Y
2013-04-03	25	33	11	L4	Y
2013-04-03	25	33	12	L4	Y
2013-04-03	25	33	13	L4	Y
2013-04-03	25	33	14	L4	Y
2013-04-03	25	33	15	L4	Y
2013-04-03	25	33	16	L4	Y
2013-04-03	25	33	17	L4	Y
2013-04-03	25	33	18	L4	Y
2013-04-03	25	33	19	L4	Y
2013-04-03	25	33	20	L4	Y
2013-04-03	25	35	1		Y
2013-04-03	25	35	2		Y
2013-04-03	25	35	3		Y
2013-04-03	25	35	4		N
2013-04-03	25	35	5		N
2013-04-03	25	35	6		N
2013-04-03	25	35	7		N
2013-04-03	25	35	8		N
2013-04-03	25	35	9		N
2013-04-03	25	35	10		N
2013-04-03	25	35	11		Y
2013-04-03	25	35	12		N
2013-04-03	25	35	13		N
2013-04-03	25	35	14		N
2013-04-03	25	35	15		N
2013-04-03	25	35	16		N
2013-04-03	25	35	17		N
2013-04-03	25	35	18		N
2013-04-03	25	35	19		Y
2013-04-03	25	35	20		N
2013-04-03	25	35	21		N
2013-04-03	25	35	22		Y
2013-04-03	25	35	23		Y
2013-04-03	25	35	24		N
2013-04-03	25	35	25		N
2013-04-03	25	35	26		N
2013-04-03	25	35	27		N
2013-04-03	25	35	28		Y
2013-04-03	25	35	29		Y
2013-04-03	25	37	1	YA	O	0	0	0
2013-04-03	25	37	2	L4	P
2013-04-03	25	37	3	L4	P
2013-04-03	25	37	4	L4	P
2013-04-03	25	37	5	L4	P
2013-04-03	25	37	6	YA		0	0	0
2013-04-03	25	37	7	YA		0	0	0
2013-04-03	25	37	8	L4	P
2013-04-03	25	37	9	L4	P
2013-04-03	25	37	10	L4	P
2013-04-03	25	37	11	YA		0	0	0
2013-04-03	25	37	12	YA		0	0	0
2013-04-03	25	37	13	L4	P
2013-04-03	25	37	14	L4	P
2013-04-03	25	37	15	M
2013-04-03	25	37	16	L4	P
2013-04-03	25	37	17	YA		0	0	0
2013-04-03	25	37	18	L4	P
2013-04-03	25	37	19	YA		0	0	0
2013-04-03	25	37	20	M
2013-04-03	25	37	21	L4	P
2013-04-03	25	37	22	YA		0	0	0
2013-04-03	25	37	23	L4	P
2013-04-03	25	37	24	L4	P
2013-04-03	25	37	25	YA		0	0	0
2013-04-03	25	37	26	YA		0	0	0
2013-04-03	25	37	27	L4	P
2013-04-03	25	39	1	YA		0	0	0
2013-04-03	25	39	2	YA			0	0
2013-04-03	25	39	3	YA			0	0
2013-04-03	25	39	4	YA		0	0	0
2013-04-03	25	39	5	YA		0	0	0
2013-04-03	25	39	6	YA		0	0	0
2013-04-03	25	39	7	YA		0	0	0
2013-04-03	25	39	8	YA		0	0	0
2013-04-03	25	39	9	YA		0	0	0
2013-04-03	25	39	10	YA		0	0	0
2013-04-03	25	39	11	YA		0	0	0
2013-04-03	25	39	12	YA		0	0	0
2013-04-03	25	39	13	YA		0	0	0
2013-04-03	25	39	14	YA		0	0	0
2013-04-03	25	39	15	YA		0	0	0
2013-04-03	25	39	16	YA		0	0	0
2013-04-03	25	39	17	YA		0	0	0
2013-04-03	25	39	18	YA			0	0
2013-04-03	25	39	19	YA			0	0
2013-04-03	25	39	20	YA		0	0	0
2013-04-03	25	39	21	YA		0	0	0
2013-04-03	25	39	22	YA		0	0	0
2013-04-03	25	39	23	YA		0	0	0
2013-04-03	25	39	24	YA		1	0	0
2013-04-03	25	39	25	YA		0	0	0
2013-04-03	25	39	26	YA			1	0
2013-04-03	25	39	27	YA		0	0	0
2013-04-03	25	39	28	YA		0	0	0
2013-04-03	25	41	1	YA		0	0
2013-04-03	25	41	2	YA			0	3
2013-04-03	25	41	3	YA		3	2	3
2013-04-03	25	41	4	YA		4	4	4
2013-04-03	25	41	5	YA		3	1	2
2013-04-03	25	41	6	YA		5	0	4
2013-04-03	25	41	7	YA		3	0	0
2013-04-03	25	41	8	YA		3	1	3
2013-04-03	25	41	9	YA		3	1	3
2013-04-03	25	41	10	YA		4	0	3
2013-04-03	25	41	11	YA		2	0
2013-04-03	25	41	12	YA		2	0	3
2013-04-03	25	41	13	YA		2	0	0
2013-04-03	25	41	14	YA		3	0	2
2013-04-03	25	41	15	YA		3	0	2
2013-04-03	25	41	16	YA		4	1	3
2013-04-03	25	41	17	YA			0	0
2013-04-03	25	41	18	YA		3	1	2
2013-04-03	25	41	19	YA		3	0	3
2013-04-03	25	41	20	YA		4	0	3
2013-04-03	25	41	21	YA		3	0	1
2013-04-03	25	41	22	YA		2	0	2
2013-04-03	25	41	23	YA		3	0	2
2013-04-03	25	41	24	YA		3	0
2013-04-03	25	41	25	YA		3	0
2013-04-03	25	43	1	YA		1	0
2013-04-03	25	43	2	YA			0	0
2013-04-03	25	43	3	YA		3	4	3
2013-04-03	25	43	4	YA		3	1	3
2013-04-03	25	43	5	YA		4	6	3
2013-04-03	25	43	6	YA		4	5	3
2013-04-03	25	43	7	YA		3	2	2
2013-04-03	25	43	8	YA			2	3
2013-04-03	25	43	9	YA		4	0
2013-04-03	25	43	10	YA		3	4	3
2013-04-03	25	43	11	YA		3	1	3
2013-04-03	25	43	12	YA		3	3	3
2013-04-03	25	43	13	YA		3	2	2
2013-04-03	25	43	14	YA		4	2	3
2013-04-03	25	43	15	YA		3	3	3
2013-04-03	25	43	16	YA		3	2	3
2013-04-03	25	43	17	YA		3	1	2
2013-04-03	25	43	18	YA		4	5	3
2013-04-03	25	43	19	YA		2	3	3
2013-04-03	25	43	20	YA		3	4	2
2013-04-03	25	43	21	YA		5	0
2013-04-03	25	43	22	YA		5	1	3
2013-04-03	25	43	23	YA		3	5	3
2013-04-03	25	43	24	YA		3	2
2013-04-03	25	43	25	YA		4	1	3
2013-04-03	25	43	26	YA			3	2
2013-04-03	25	43	27	YA		4	0	2
2013-11-15	25	33	1	L4	Y
2013-11-15	25	33	2	L4	Y
2013-11-15	25	33	3	L4	Y
2013-11-15	25	33	4	L4	Y
2013-11-15	25	33	5	L4	Y
2013-11-15	25	33	6	L4	Y
2013-11-15	25	33	7	L4	Y
2013-11-15	25	33	8	L4	Y
2013-11-15	25	33	9	L4	Y
2013-11-15	25	33	10	L4	Y
2013-11-15	25	33	11	L4	Y
2013-11-15	25	33	12	L4	Y
2013-11-15	25	33	13	L4	Y
2013-11-15	25	33	14	L4	Y
2013-11-15	25	33	15	L4	Y
2013-11-15	25	33	16	L4	Y
2013-11-15	25	33	17	L4	Y
2013-11-15	25	33	18	L4	Y
2013-11-15	25	33	19	L4	Y
2013-11-15	25	33	20	L4	Y
2013-11-15	25	33	21	L4	Y
2013-11-15	25	33	22	L4	Y
2013-11-15	25	33	23	L4	Y
2013-11-15	25	33	24	L4	Y
2013-11-15	25	33	25	L4	Y
2013-11-15	25	33	26	L4	Y
2013-11-15	25	35	1	L4	Y
2013-11-15	25	35	2	L4	Y
2013-11-15	25	35	3	L4	Y
2013-11-15	25	35	4	L4	Y
2013-11-15	25	35	5	L4	N
2013-11-15	25	35	6	L4	Y
2013-11-15	25	35	7	L4	N
2013-11-15	25	35	8	L4	Y
2013-11-15	25	35	9	L4	Y
2013-11-15	25	35	10	L4	Y
2013-11-15	25	35	11	L4	Y
2013-11-15	25	35	12	L4	Y
2013-11-15	25	35	13	L4	Y
2013-11-15	25	35	14	L4	Y
2013-11-15	25	35	15	L4	Y
2013-11-15	25	35	16	L4	Y
2013-11-15	25	35	17	L4	Y
2013-11-15	25	35	18	L4	N
2013-11-15	25	35	19	L4	Y
2013-11-15	25	35	20	L4	Y
2013-11-15	25	35	21	L4	Y
2013-11-15	25	35	22	L4	Y
2013-11-15	25	35	23	L4	Y
2013-11-15	25	35	24	L4	Y
2013-11-15	25	35	25	L4	Y
2013-11-15	25	35	26	L4	Y
2013-11-15	25	37	1	L4	N
2013-11-15	25	37	2	YA	Y
2013-11-15	25	37	3	L4	N
2013-11-15	25	37	4	L4	N
2013-11-15	25	37	5	L4	N
2013-11-15	25	37	6	L4	N
2013-11-15	25	37	7	L4	N
2013-11-15	25	37	8	L4	N
2013-11-15	25	37	9	L4	N
2013-11-15	25	37	10	L4	N
2013-11-15	25	37	11	L4	N
2013-11-15	25	37	12	L4	Y
2013-11-15	25	37	13	L4	N
2013-11-15	25	37	14	L4	N
2013-11-15	25	37	15	L4	N
2013-11-15	25	37	16	L4	N
2013-11-15	25	37	17	L4	N
2013-11-15	25	37	18	L4	N
2013-11-15	25	37	19	L4	Y
2013-11-15	25	37	20	L4	N
2013-11-15	25	37	21	L4	N
2013-11-15	25	37	22	L4	N
2013-11-15	25	37	23	L4	N
2013-11-15	25	37	24	L4	Y
2013-11-15	25	37	25	YA	Y
2013-11-15	25	37	26	L4	Y
2013-11-15	25	37	1	L4	P
2013-11-15	25	37	2	L4	P
2013-11-15	25	37	3	L4	O
2013-11-15	25	37	4	L4	O
2013-11-15	25	37	5	L4	O
2013-11-15	25	37	6	L4	P
2013-11-15	25	37	7	L4	P
2013-11-15	25	37	8	L4	P
2013-11-15	25	37	9	YA	O	0	0	0
2013-11-15	25	37	10	L4	P
2013-11-15	25	37	11	L4	P
2013-11-15	25	37	12	L4	P
2013-11-15	25	37	13	L4	P
2013-11-15	25	37	14	L4	P
2013-11-15	25	37	15	L4	P
2013-11-15	25	37	16	L4	P
2013-11-15	25	37	17	L4	P
2013-11-15	25	37	18	L4	P
2013-11-15	25	37	19	L4	O
2013-11-15	25	37	20	L4	O
2013-11-15	25	37	21	L4	P
2013-11-15	25	37	22	L4	P
2013-11-15	25	37	23	L4	O
2013-11-15	25	37	24	L4	P
2013-11-15	25	37	25	L4	P
2013-11-15	25	37	26	YA	O	0	0	0
2013-11-15	25	39	1	YA	Y	0	0	0
2013-11-15	25	39	2	YA	Y	0	0	0
2013-11-15	25	39	3	L4	N
2013-11-15	25	39	4	L4	N
2013-11-15	25	39	5	L4	N
2013-11-15	25	39	6	YA	Y	0	0	0
2013-11-15	25	39	7	L4	N
2013-11-15	25	39	8	YA	Y	0	0	0
2013-11-15	25	39	9	L4	N
2013-11-15	25	39	10	L4	N
2013-11-15	25	39	11	YA	Y	0	0	0
2013-11-15	25	39	12	YA	Y	0	0	0
2013-11-15	25	39	13	YA	Y	0	0	0
2013-11-15	25	39	14	YA	Y	0	0	0
2013-11-15	25	39	15	YA	Y	0	0	0
2013-11-15	25	39	16	YA	Y	0	0	0
2013-11-15	25	39	17	YA	Y	0	0	0
2013-11-15	25	39	18	L4	N
2013-11-15	25	39	19	YA	Y	0	0	0
2013-11-15	25	39	20	YA	Y	0	0	0
2013-11-15	25	39	1	YA	O	0	0	0
2013-11-15	25	39	2	L4	O	0	0	0
2013-11-15	25	39	3	YA	O	0	0	0
2013-11-15	25	39	4	YA	O	0	0	0
2013-11-15	25	39	5	YA	O	0	0	0
2013-11-15	25	39	6	L4	P	0	0	0
2013-11-15	25	39	7	L4	P	0	0	0
2013-11-15	25	39	8	L4	P	0	0	0
2013-11-15	25	39	9	L4	O	0	0	0
2013-11-15	25	39	10	L4	P	0	0	0
2013-11-15	25	39	11	YA	O	0	0	0
2013-11-15	25	39	12	L4	P	0	0	0
2013-11-15	25	39	13	M	O	0	0	0
2013-11-15	25	39	14	L4	P	0	0	0
2013-11-15	25	39	15	YA	O	0	0	0
2013-11-15	25	39	16	YA	O	0	0	0
2013-11-15	25	39	17	YA	O	0	0	0
2013-11-15	25	39	18	YA	O	0	0	0
2013-11-15	25	39	19	M	O	0	0	0
2013-11-15	25	39	20	YA	O	0	0	0
2013-11-15	25	39	21	L4	P	0	0	0
2013-11-15	25	39	22	YA	O	0	0	0
2013-11-15	25	39	23	L4	O	0	0	0
2013-11-15	25	39	24	L4	P	0	0	0
2013-11-15	25	39	25	L4	P	0	0	0
2013-11-15	25	39	26	YA	O	0	0	0
2013-11-15	25	41	1	YA	Y
2013-11-15	25	41	2	YA	Y
2013-11-15	25	41	3	YA	Y
2013-11-15	25	41	4	YA	Y
2013-11-15	25	41	5	YA	Y
2013-11-15	25	41	6	YA	Y
2013-11-15	25	41	7	YA	Y
2013-11-15	25	41	8	YA	Y
2013-11-15	25	41	9	YA	Y
2013-11-15	25	41	10	YA	Y
2013-11-15	25	41	11	YA	Y
2013-11-15	25	41	12	YA	Y
2013-11-15	25	41	13	YA	Y
2013-11-15	25	41	14	YA	Y
2013-11-15	25	41	15	YA	Y
2013-11-15	25	41	16	YA	Y
2013-11-15	25	41	17	YA	Y
2013-11-15	25	41	18	YA	Y
2013-11-15	25	41	19	YA	Y
2013-11-15	25	41	20	YA	Y
2013-11-15	25	41	21	YA	Y
2013-11-15	25	41	22	YA	Y
2013-11-15	25	41	1	YA	O	0	0	0
2013-11-15	25	41	2	YA	O	4	0	3
2013-11-15	25	41	3	YA	O	3	0	2
2013-11-15	25	41	4	YA	O	2	0	1
2013-11-15	25	41	5	YA	O	2	0	3
2013-11-15	25	41	6	YA	O	0	0	0
2013-11-15	25	41	7	M	O	0	0	0
2013-11-15	25	41	8	YA	O	0	0	0
2013-11-15	25	41	9	YA	O	0	0	0
2013-11-15	25	41	10	YA	O	2	0	0
2013-11-15	25	41	11	YA	O	0	0	0
2013-11-15	25	41	12	YA	O	0	0
2013-11-15	25	41	13	YA	O	1	0	1
2013-11-15	25	41	14	YA	O	2	0
2013-11-15	25	41	15	YA	O	2	0	1
2013-11-15	25	41	16	YA	O	4	0	4
2013-11-15	25	41	17	YA	O	3	0	3
2013-11-15	25	41	18	YA	O	2	0	1
2013-11-15	25	41	19	YA	O	0	0	0
2013-11-15	25	41	20	YA	O		0	0
2013-11-15	25	41	21	YA	O	0	0	0
2013-11-15	25	41	22	YA	O	3	0	2
2013-11-15	25	41	23	YA	O	0	0	0
2013-11-15	25	41	24	YA	O	2	0
2013-11-15	25	41	25	YA	O	2	0	1
2013-11-15	25	41	26	YA	O		0	0
2013-11-15	25	41	27	YA	O	3	0	2
2013-11-15	25	41	28	YA	O	0	0	0
2013-11-15	25	43	1	YA	O	3	0
2013-11-15	25	43	2	YA	O	3	0	2
2013-11-15	25	43	3	YA	O	2	2	3
2013-11-15	25	43	4	YA	O		0	0
2013-11-15	25	43	5	YA	O	3	2	2
2013-11-15	25	43	6	YA	O	3	0	2
2013-11-15	25	43	7	YA	O	2	3	2
2013-11-15	25	43	8	YA	O		2	3
2013-11-15	25	43	9	YA	O	3	1	4
2013-11-15	25	43	10	YA	O	0	0	0
2013-11-15	25	43	11	YA	O	3	1	3
2013-11-15	25	43	12	YA	O	3	0	3
2013-11-15	25	43	13	YA	O	3	1	3
2013-11-15	25	43	14	YA	O	5	2	3
2013-11-15	25	43	15	YA	O	3	5	3
2013-11-15	25	43	16	YA	O	1	0	2
2013-11-15	25	43	17	YA	O	2	0	2
2013-11-15	25	43	18	YA	O	3	1	3
2013-11-15	25	43	19	YA	O	2	1	2
2013-11-15	25	43	20	YA	O		0	0
2013-11-15	25	43	21	YA	O	3	3	2
2013-11-15	25	43	22	YA	O	3	0	3
2013-11-15	25	43	23	YA	O	2	3	2
2013-11-15	25	43	24	YA	O	3	0	2
2013-11-15	25	43	25	YA	O	2	3	2
2013-11-15	25	43	26	YA	O	3	0	3
2013-11-15	25	43	27	YA	O	4	0	2
2013-11-15	25	43	28	YA	O	3	0	3
2013-11-15	25	43	29	YA	O	3	0	3
2013-11-15	25	43	30	YA	O	3	0	2
2013-11-15	25	45	1	YA	O		2	3
2013-11-15	25	45	2	YA	O	3	4	3
2013-11-15	25	45	3	YA	O	3	2	3
2013-11-15	25	45	4	YA	O	6	1	3
2013-11-15	25	45	5	YA	O		3	3
2013-11-15	25	45	6	YA	O		3	3
2013-11-15	25	45	7	YA	O	4	6
2013-11-15	25	45	8	YA	O	4	3	3
2013-11-15	25	45	9	YA	O	3	4	3
2013-11-15	25	45	10	YA	O	3	8	2
2013-11-15	25	45	11	YA	O		4	3
2013-11-15	25	45	12	YA	O	3	6	3
2013-11-15	25	45	13	YA	O	3	1	3
2013-11-15	25	45	14	YA	O	5	7	4
2013-11-15	25	45	15	YA	O	4	6	3
2013-11-15	25	45	16	YA	O	3	6
2013-11-15	25	45	17	YA	O	0	0
2013-11-15	25	45	18	YA	O	2	1	3
2013-11-15	25	45	19	YA	O	3	1	2
2013-11-15	25	45	20	YA	O	3	6	3
2013-11-15	25	45	21	YA	O	4	1	2
2013-11-25	25	33	1	L4	Y
2013-11-25	25	33	2	L4	Y
2013-11-25	25	33	3	L4	Y
2013-11-25	25	33	4	L4	Y
2013-11-25	25	33	5	L4	Y
2013-11-25	25	33	6	L4	Y
2013-11-25	25	33	7	L4	Y
2013-11-25	25	33	8	L4	Y
2013-11-25	25	33	9	L4	Y
2013-11-25	25	33	10	L4	Y
2013-11-25	25	33	11	L4	Y
2013-11-25	25	33	12	L4	Y
2013-11-25	25	33	13	L4	Y
2013-11-25	25	33	14	L4	Y
2013-11-25	25	33	15	L4	Y
2013-11-25	25	33	16	L4	Y
2013-11-25	25	33	17	L4	Y
2013-11-25	25	33	18	L4	Y
2013-11-25	25	33	19	L4	Y
2013-11-25	25	33	20	L4	Y
2013-11-25	25	33	21	L4	Y
2013-11-25	25	33	22	L4	N
2013-11-25	25	35	1	L4	N
2013-11-25	25	35	2	L4	Y
2013-11-25	25	35	3	L4	Y
2013-11-25	25	35	4	L4	Y
2013-11-25	25	35	5	L4	Y
2013-11-25	25	35	6	L4	N
2013-11-25	25	35	7	L4	Y
2013-11-25	25	35	8	L4	N
2013-11-25	25	35	9	L4	Y
2013-11-25	25	35	10	L4	Y
2013-11-25	25	35	11	L4	Y
2013-11-25	25	35	12	L4	N
2013-11-25	25	35	13	L4	Y
2013-11-25	25	35	14	L4	Y
2013-11-25	25	35	15	L4	Y
2013-11-25	25	35	16	L4	N
2013-11-25	25	35	17	L4	N
2013-11-25	25	35	18	L4	N
2013-11-25	25	35	19	L4	Y
2013-11-25	25	35	20	L4	N
2013-11-25	25	35	21	L4	Y
2013-11-25	25	35	22	L4	N
2013-11-25	25	35	23	L4	Y
2013-11-25	25	37	1	L4	N
2013-11-25	25	37	2	L4	N
2013-11-25	25	37	3	L4	N
2013-11-25	25	37	4	L4	Y
2013-11-25	25	37	5	L4	N
2013-11-25	25	37	6	L4	N
2013-11-25	25	37	7	L4	N
2013-11-25	25	37	8	L4	N
2013-11-25	25	37	9	L4	N
2013-11-25	25	37	10	L4	N
2013-11-25	25	37	11	YA	Y
2013-11-25	25	37	12	L4	N
2013-11-25	25	37	13	L4	Y
2013-11-25	25	37	14	L4	Y
2013-11-25	25	37	15	L4	N
2013-11-25	25	37	16	L4	Y
2013-11-25	25	37	17	L4	N
2013-11-25	25	37	18	L4	N
2013-11-25	25	37	19	L4	N
2013-11-25	25	37	20	L4	N
2013-11-25	25	37	21	L4	N
2013-11-25	25	37	22	L4	N
2013-11-25	25	37	23	L4	N
2013-11-25	25	37	24	YA	Y
2013-11-25	25	37	25	L4	Y
2013-11-25	25	39	1	YA	Y
2013-11-25	25	39	2	YA	Y
2013-11-25	25	39	3	YA	Y
2013-11-25	25	39	4	YA	Y
2013-11-25	25	39	5	L4	N
2013-11-25	25	39	6	L4	N
2013-11-25	25	39	7	YA	Y
2013-11-25	25	39	8	YA	N
2013-11-25	25	39	9	YA	N
2013-11-25	25	39	10	YA	Y
2013-11-25	25	39	11	YA	Y
2013-11-25	25	39	12	L4	N
2013-11-25	25	39	13	L4	N
2013-11-25	25	39	14	YA	Y
2013-11-25	25	39	15	YA	Y
2013-11-25	25	39	16	L4	N
2013-11-25	25	39	17	YA	Y
2013-11-25	25	39	18	L4	N
2013-11-25	25	39	19	YA	Y
2013-11-25	25	39	20	YA	Y
2013-11-25	25	39	21	L4	N
2013-11-25	25	39	22	L4	N
2013-11-25	25	39	1	YA	O	0	0	0
2013-11-25	25	39	2	YA	O	0	0	0
2013-11-25	25	39	3	YA	O	0	0	0
2013-11-25	25	39	4	YA	O	0	0	0
2013-11-25	25	39	5	YA	O	0	0	0
2013-11-25	25	39	6	YA	O	0	0	0
2013-11-25	25	39	7	L4	P
2013-11-25	25	39	8	YA	O	0	0	0
2013-11-25	25	39	9	YA	O		0	0
2013-11-25	25	39	10	L4	P
2013-11-25	25	39	11	YA	O	0	0	0
2013-11-25	25	39	12	YA	O	0	0	0
2013-11-25	25	39	13	YA	O		0	0
2013-11-25	25	39	14	YA	O	0	0	0
2013-11-25	25	39	15	YA	O	0	0	0
2013-11-25	25	39	16	YA	O	0	0	0
2013-11-25	25	39	17	YA	O	0	0	0
2013-11-25	25	39	18	YA	O	0	0
2013-11-25	25	39	19	YA	O	0	0	0
2013-11-25	25	39	20	YA	O	0	0	0
2013-11-25	25	39	21	YA	O	0	0	0
2013-11-25	25	39	22	YA	O	0	0	0
2013-11-25	25	39	23	YA	O	0	0	0
2013-11-25	25	39	24	YA	O	0	0	0
2013-11-25	25	39	25	YA	O	0	0	0
2013-11-25	25	39	26	YA	O	0	0	0
2013-11-25	25	39	27	YA	O	0	0	0
2013-11-25	25	39	28	YA	O	0	0	0
2013-11-25	25	39	29	YA	O	0	0	0
2013-11-25	25	39	30	YA	O	0	0	0
2013-11-25	25	39	31	YA	O	0	0	0
2013-11-25	25	39	32	YA	O	0	0	0
2013-11-25	25	39	33	YA	O	0	0	0
2013-11-25	25	41	1	YA	O	3	0
2013-11-25	25	41	2	YA	O	4	0	3
2013-11-25	25	41	3	YA	O	4	0	3
2013-11-25	25	41	4	YA	O	4	0	4
2013-11-25	25	41	5	YA	O	3	0	0
2013-11-25	25	41	6	YA	O	4	0	3
2013-11-25	25	41	7	YA	O	2	0	1
2013-11-25	25	41	8	YA	O	3	0	3
2013-11-25	25	41	9	YA	O	4	0	3
2013-11-25	25	41	10	YA	O	0	0	0
2013-11-25	25	41	11	YA	O	3	0	3
2013-11-25	25	41	12	YA	O	2	0
2013-11-25	25	41	13	YA	O	0	0	0
2013-11-25	25	41	14	YA	O	3	0	2
2013-11-25	25	41	15	YA	O	1	0	3
2013-11-25	25	41	16	YA	O	3	0	2
2013-11-25	25	41	17	YA	O	0	0	0
2013-11-25	25	41	18	YA	O	2	0	3
2013-11-25	25	41	19	YA	O		0	3
2013-11-25	25	41	20	YA	O	4	0	3
2013-11-25	25	41	21	YA	O		0	3
2013-11-25	25	41	22	YA	O	0	0	0
2013-11-25	25	41	23	YA	O	4	0	4
2013-11-25	25	41	24	YA	O	3	0	3
2013-11-25	25	43	1	YA		3	2	4
2013-11-25	25	43	2	YA		4	1	3
2013-11-25	25	43	3	YA		3	0
2013-11-25	25	43	4	YA			1	3
2013-11-25	25	43	5	YA		4	0
2013-11-25	25	43	6	YA		4	0	4
2013-11-25	25	43	7	YA		3	0	3
2013-11-25	25	43	8	YA		3	2	3
2013-11-25	25	43	9	YA		3	2	3
2013-11-25	25	43	10	YA		3	0	3
2013-11-25	25	43	11	YA		4	5	3
2013-11-25	25	43	12	YA		4	4	3
2013-11-25	25	43	13	YA			2	4
2013-11-25	25	43	14	YA		5	0	4
2013-11-25	25	43	15	YA		5	1	3
2013-11-25	25	43	16	YA		3	1	3
2013-11-25	25	43	17	YA		4	1	3
2013-11-25	25	43	18	YA			5	3
2013-11-25	25	43	19	YA		1	0	1
2013-11-25	25	43	20	YA		3	1	3
2013-11-25	25	43	21	YA		4	4	3
2013-11-25	25	43	22	YA			0	3
2013-11-25	25	43	23	YA		3	5	3
2013-11-25	25	43	24	YA			2	2
2013-11-25	25	43	25	YA			3	2
2013-11-25	25	43	26	YA		3	0	3
2013-11-25	25	43	27	YA		4	1	4
2013-11-25	25	43	28	YA		4	4	3
2013-11-25	25	43	29	YA		3	5	3
2013-11-25	25	45	1	YA			4	3
2013-11-25	25	45	2	YA		3	2	3
2013-11-25	25	45	3	YA		3	8	3
2013-11-25	25	45	4	YA		5	6	4
2013-11-25	25	45	5	YA		3	5	2
2013-11-25	25	45	6	YA		3	3	2
2013-11-25	25	45	7	YA		3	6	4
2013-11-25	25	45	8	YA		4	5	4
2013-11-25	25	45	9	YA		3	5	3
2013-11-25	25	45	10	YA		4	1	2
2013-11-25	25	45	11	YA		3	10	3
2013-11-25	25	45	12	YA		3	6	4
2013-11-25	25	45	13	YA		3	2	2
2013-11-25	25	45	14	YA		5	2	3
2013-11-25	25	45	15	YA		5	4	4
2013-11-25	25	45	16	YA		2	5	2
2013-11-25	25	45	17	YA		5	7	4
2013-11-25	25	45	18	YA		4	5	3
2013-11-25	25	45	19	YA		2	4	2
2013-11-25	25	45	20	YA		3	7	3
2013-11-25	25	45	21	YA		3	5	4

## Sheet: 20º
S1 Table. Raw data for developmental timing at 20ºC (presented in Figure 1).
Date	Temp	Age	Num	Stage	Lethargus	Oocytes_Ant	Embryos	Oocytes_Post
2015-02-09	20	44	1	L4
2015-02-09	20	44	2	L4
2015-02-09	20	44	3	L4
2015-02-09	20	44	4	L4
2015-02-09	20	44	5	L4
2015-02-09	20	44	6	L4
2015-02-09	20	44	7	L4
2015-02-09	20	44	8	L4
2015-02-09	20	44	9	L4
2015-02-09	20	44	10	L4
2015-02-09	20	44	11	L4
2015-02-09	20	44	12	L4
2015-02-09	20	44	13	L4
2015-02-09	20	44	14	L4
2015-02-09	20	44	15	L4
2015-02-09	20	44	16	L4
2015-02-09	20	44	17	L4
2015-02-09	20	44	18	L4
2015-02-09	20	44	19	L4
2015-02-09	20	44	20	L4
2015-02-09	20	44	21	L4
2015-02-09	20	44	22	L4
2015-02-09	20	44	23	L4
2015-02-09	20	44	24	L4
2015-02-09	20	44	25	L4
2015-02-09	20	44	26	L4
2015-02-09	20	44	27	L4
2015-02-09	20	44	28	L4
2015-02-09	20	44	29	L4
2015-02-09	20	44	30	L4
2015-02-09	20	44	31	L4
2015-02-09	20	44	32	L4
2015-02-09	20	44	33	L4
2015-02-09	20	44	34	L4
2015-02-09	20	44	35	L4
2015-02-09	20	46	1	L4	P
2015-02-09	20	46	2	L4	O
2015-02-09	20	46	3	L4	O
2015-02-09	20	46	4	L4	O
2015-02-09	20	46	5	L4	P
2015-02-09	20	46	6	L4	P
2015-02-09	20	46	7	L4	P
2015-02-09	20	46	8	L4	P
2015-02-09	20	46	9	L4	O
2015-02-09	20	46	10	L4	P
2015-02-09	20	46	11	L4	P
2015-02-09	20	46	12	L4	P
2015-02-09	20	46	13	L4	O
2015-02-09	20	46	14	L4	O
2015-02-09	20	46	15
2015-02-09	20	46	16	L4	P
2015-02-09	20	46	17	L4	P
2015-02-09	20	46	18	YA	O
2015-02-09	20	46	19	L4	P
2015-02-09	20	46	20	L4	P
2015-02-09	20	46	21	L4	O
2015-02-09	20	46	22	L4	P
2015-02-09	20	46	23	L4	O
2015-02-09	20	46	24	L4	O
2015-02-09	20	46	25	L4	O
2015-02-09	20	48	1	YA
2015-02-09	20	48	2	YA
2015-02-09	20	48	3	YA
2015-02-09	20	48	4	YA
2015-02-09	20	48	5	L4	P
2015-02-09	20	48	6	YA
2015-02-09	20	48	7	L4	P
2015-02-09	20	48	8	YA
2015-02-09	20	48	9	YA
2015-02-09	20	48	10	YA
2015-02-09	20	48	11	L4	P
2015-02-09	20	48	12	L4	P
2015-02-09	20	48	13	L4	P
2015-02-09	20	48	14	L4	P
2015-02-09	20	48	15	YA
2015-02-09	20	48	16	YA
2015-02-09	20	48	17	L4	P
2015-02-09	20	48	18	L4	P
2015-02-09	20	48	19	YA
2015-02-09	20	48	20	YA
2015-02-09	20	48	21	YA
2015-02-09	20	48	22	YA
2015-02-09	20	48	23	YA
2015-02-09	20	48	24	L4	O
2015-02-09	20	48	25	L4	P
2015-02-09	20	48	26	L4	P
2015-02-09	20	48	27	YA
2015-02-09	20	48	28	YA
2015-02-09	20	48	29	L4	P
2015-02-09	20	48	30	L4	P
2015-02-09	20	48	31	YA
2015-02-09	20	48	32	YA
2015-02-09	20	48	33	YA
2015-02-09	20	48	34	L4	P
2015-02-09	20	48	35	L4	P
2015-02-09	20	50	1	YA		1	0	0
2015-02-09	20	50	2	YA		0	0	0
2015-02-09	20	50	3	YA		0	0	0
2015-02-09	20	50	4	YA		0	0	0
2015-02-09	20	50	5	YA		1	0	0
2015-02-09	20	50	6	YA		1	0	0
2015-02-09	20	50	7	YA		0	0	0
2015-02-09	20	50	8	YA		1	0	1
2015-02-09	20	50	9	YA		1	0	0
2015-02-09	20	50	10	YA		0	0	0
2015-02-09	20	50	11	YA		0	0	0
2015-02-09	20	50	12	YA		0	0	0
2015-02-09	20	50	13	YA		0	0	0
2015-02-09	20	50	14	L4	P
2015-02-09	20	50	15	YA		0	0	0
2015-02-09	20	50	16	YA		2	0	1
2015-02-09	20	50	17	YA		0	0	1
2015-02-09	20	50	18	YA		0	0	0
2015-02-09	20	50	19	YA		2	0	1
2015-02-09	20	50	20	YA		0	0	0
2015-02-09	20	50	21	YA		0	0	0
2015-02-09	20	50	22	YA		0	0	0
2015-02-09	20	50	23	YA		0	0	0
2015-02-09	20	50	24	YA		0	0	0
2015-02-09	20	50	25	YA		0	0	0
2015-02-09	20	50	26	L4	P
2015-02-09	20	50	27	YA		0	0	0
2015-02-09	20	52	1	YA		3	0	2
2015-02-09	20	52	2	YA		2	0	2
2015-02-09	20	52	3	YA		2	0	2
2015-02-09	20	52	4	YA		3	0	2
2015-02-09	20	52	5	YA		3	2	2
2015-02-09	20	52	6	YA		3	0	1
2015-02-09	20	52	7	YA		3	3	3
2015-02-09	20	52	8	YA			0	2
2015-02-09	20	52	9	YA		4	0	0
2015-02-09	20	52	10	YA		3	1	3
2015-02-09	20	52	11	YA		3	1	3
2015-02-09	20	52	12	YA		3	0	3
2015-02-09	20	52	13	YA		3	0	2
2015-02-09	20	52	14	YA		2	0	2
2015-02-09	20	52	15	YA		0	0	0
2015-02-09	20	52	16	YA		3	1	3
2015-02-09	20	52	17	YA		0	0	0
2015-02-09	20	52	18	YA		3	0	2
2015-02-09	20	52	19	YA			0	0
2015-02-09	20	52	20	YA		3	2	2
2015-02-09	20	52	21	YA		1	0	1
2015-02-09	20	52	22	YA		2	0	3
2015-02-09	20	52	23	YA		4	0	3
2015-02-09	20	52	24	YA		2	0	2
2015-02-09	20	52	25	YA		3	0	1
2015-02-09	20	52	26	YA		3	0	3
2015-02-09	20	54	1	YA		4	5	4
2015-02-09	20	54	2	YA		3	2	3
2015-02-09	20	54	3	YA			2	3
2015-02-09	20	54	4	YA		3	4	3
2015-02-09	20	54	5	YA		3	4	3
2015-02-09	20	54	6	YA			0	2
2015-02-09	20	54	7	YA		3	2	2
2015-02-09	20	54	8	YA		4	2	3
2015-02-09	20	54	9	YA		4	2	2
2015-02-09	20	54	10	YA			0	2
2015-02-09	20	54	11	YA		3	1	3
2015-02-09	20	54	12	YA			1	3
2015-02-09	20	54	13	YA		3	4	2
2015-02-09	20	54	14	YA		3	0
2015-02-09	20	54	15	YA		3	3	2
2015-02-09	20	54	16	YA		4	4	3
2015-02-09	20	54	17	YA		4	1	3
2015-02-09	20	54	18	YA		3	3	3
2015-02-09	20	54	19	YA		4	5	3
2015-02-09	20	54	20	YA		3	0	3
2015-02-09	20	54	21	YA		4	0	0
2015-02-09	20	54	22	YA		3	1	2
2015-02-09	20	54	23	YA		3	0	3
2015-02-09	20	54	24	YA		3	0	3
2015-02-09	20	54	25	YA		2	2	3

## Sheet: 15º
S1 Table. Raw data for developmental timing at 15ºC (presented in Figure 1).
Date	Temp	Age	Num	Stage	Lethargus	Oocytes_Ant	Embryos	Oocytes_Post
2013-04-06	15	83	1	L4	N
2013-04-06	15	83	2	L4	Y
2013-04-06	15	83	3	L4	Y
2013-04-06	15	83	4	L4	Y
2013-04-06	15	83	5	L4	Y
2013-04-06	15	83	6	L4	Y
2013-04-06	15	83	7	L4	Y
2013-04-06	15	83	8	L4	Y
2013-04-06	15	83	9	L4	Y
2013-04-06	15	83	10	L4	Y
2013-04-06	15	83	11	L4	Y
2013-04-06	15	83	12	L4	Y
2013-04-06	15	83	13	L4	Y
2013-04-06	15	83	14	L4	Y
2013-04-06	15	83	15	L4	Y
2013-04-06	15	83	16	L4	Y
2013-04-06	15	83	17	L4	Y
2013-04-06	15	83	18	L4	Y
2013-04-06	15	83	19	L4	Y
2013-04-06	15	83	20	L4	Y
2013-04-06	15	85	1	L4	N
2013-04-06	15	85	2	L4	N
2013-04-06	15	85	3	L4	N
2013-04-06	15	85	4	L4	N
2013-04-06	15	85	5	YA	Y	0	0	0
2013-04-06	15	85	6	L4	Y
2013-04-06	15	85	7	L4	N
2013-04-06	15	85	8	YA	Y
2013-04-06	15	85	9	YA	Y
2013-04-06	15	85	10	L4	Y
2013-04-06	15	85	11	L4	N
2013-04-06	15	85	12	YA	Y
2013-04-06	15	85	13	L4	Y
2013-04-06	15	85	14	L4	Y
2013-04-06	15	85	15	L4	Y
2013-04-06	15	85	16	YA	Y
2013-04-06	15	85	17	L4	N
2013-04-06	15	85	18	YA	Y
2013-04-06	15	85	19	L4	Y
2013-04-06	15	85	20	YA	Y
2013-04-06	15	85	21	L4	N
2013-04-06	15	85	22	M	Y
2013-04-06	15	85	23	YA	Y
2013-04-06	15	85	24	L4	N
2013-04-06	15	85	25	YA	Y	0	0	0
2013-04-06	15	85	26	YA	Y	0	0	0
2013-04-06	15	85	27	YA	Y
2013-04-06	15	85	28	YA	Y
2013-04-06	15	85	29	L4	N
2013-04-06	15	87	1	L4	P
2013-04-06	15	87	2	YA		0	0	0
2013-04-06	15	87	3	YA			0	0
2013-04-06	15	87	4	YA		0		0
2013-04-06	15	87	5	YA		0	0	0
2013-04-06	15	87	6	YA		0	0	0
2013-04-06	15	87	7	YA		0	0	0
2013-04-06	15	87	8	YA		0	0	0
2013-04-06	15	87	9	YA		0	0	0
2013-04-06	15	87	10	YA		0	0	0
2013-04-06	15	87	11	YA		0	0	0
2013-04-06	15	87	12	L4	P
2013-04-06	15	87	13	L4	P
2013-04-06	15	87	14	YA		0	0	0
2013-04-06	15	87	15	L4	O
2013-04-06	15	87	16	YA		0	0	0
2013-04-06	15	87	17	L4	P
2013-04-06	15	87	18	YA		0	0	0
2013-04-06	15	87	19	L4	P
2013-04-06	15	87	20	YA		0	0	0
2013-04-06	15	87	21	L4	P
2013-04-06	15	87	22	YA		0	0	0
2013-04-06	15	87	23	M
2013-04-06	15	87	24	YA		0	0	0
2013-04-06	15	87	25	YA			0	0
2013-04-06	15	87	26	L4	O
2013-04-06	15	87	27	YA		0	0	0
2013-04-06	15	89	1	L4	O
2013-04-06	15	89	2	YA		0	0	0
2013-04-06	15	89	3	YA		0		0
2013-04-06	15	89	4	L4	P
2013-04-06	15	89	5	YA		0	0	0
2013-04-06	15	89	6	L4	P
2013-04-06	15	89	7	L4	P
2013-04-06	15	89	8	YA		0	0	0
2013-04-06	15	89	9	YA		0	0	0
2013-04-06	15	89	10	YA		0		0
2013-04-06	15	89	11	YA		0	0	0
2013-04-06	15	89	12	YA		0	0	0
2013-04-06	15	89	13	L4	O
2013-04-06	15	89	14	YA		0	0	0
2013-04-06	15	89	15	YA		0	0	0
2013-04-06	15	89	16	YA			0	0
2013-04-06	15	89	17	YA		0	0	0
2013-04-06	15	89	18	YA		0	0	0
2013-04-06	15	89	19	YA		0	0	0
2013-04-06	15	89	20	YA			0	0
2013-04-06	15	89	21	YA		0		0
2013-04-06	15	89	22	YA		0	0	0
2013-04-06	15	89	23	YA		0	0	0
2013-04-06	15	89	24	YA		0		0
2013-04-06	15	89	25	YA		0	0	0
2013-04-06	15	89	26	YA		0	0	0
2013-04-06	15	89	27	YA		0	0	0
2013-04-06	15	89	28	YA		0	0	0
2013-11-27	15	81	1	L4	Y
2013-11-27	15	81	2	L4	N
2013-11-27	15	81	3	L4	Y
2013-11-27	15	81	4	L4	N
2013-11-27	15	81	5	L4	N
2013-11-27	15	81	6	L4	Y
2013-11-27	15	81	7	L4	N
2013-11-27	15	81	8	L4	N
2013-11-27	15	81	9	L4	Y
2013-11-27	15	81	10	L4	Y
2013-11-27	15	81	11	L4	Y
2013-11-27	15	81	12	L4	N
2013-11-27	15	81	13	L4	N
2013-11-27	15	81	14	L4	Y
2013-11-27	15	81	15	L4	Y
2013-11-27	15	81	16	L4	N
2013-11-27	15	81	17	L4	Y
2013-11-27	15	81	18	YA	Y
2013-11-27	15	81	19	L4	Y
2013-11-27	15	81	20	L4	Y
2013-11-27	15	81	21	L4	N
2013-11-27	15	83	1	L4	O
2013-11-27	15	83	2	L4	P
2013-11-27	15	83	3	L4	P
2013-11-27	15	83	4	L4	P
2013-11-27	15	83	5	L4	P
2013-11-27	15	83	6	YA	O	0	0	0
2013-11-27	15	83	7	L4	O
2013-11-27	15	83	8	L4	P
2013-11-27	15	83	9	L4	O
2013-11-27	15	83	10	L4	P
2013-11-27	15	83	11	L4	O
2013-11-27	15	83	12	L4	O
2013-11-27	15	83	13	L4	P
2013-11-27	15	83	14	YA	O	0	0	0
2013-11-27	15	85	1	YA	O	0	0	0
2013-11-27	15	85	2	L4	P
2013-11-27	15	85	3	L4	P
2013-11-27	15	85	4	L4	P
2013-11-27	15	85	5	L4	O
2013-11-27	15	85	6	L4	P
2013-11-27	15	85	7	YA	O	0	0	0
2013-11-27	15	85	8	YA	O	0	0	0
2013-11-27	15	85	9	L4	P
2013-11-27	15	85	10	YA	O	0	0	0
2013-11-27	15	85	11	YA	O	0	0	0
2013-11-27	15	85	12	YA	O	0	0	0
2013-11-27	15	85	13	YA	O	0	0	0
2013-11-27	15	85	14	M	P
2013-11-27	15	85	15	YA	O	0	0	0
2013-11-27	15	85	16	M	P
2013-11-27	15	85	17	YA	O	0	0	0
2013-11-27	15	85	18	L4	O
2013-11-27	15	85	19	L4	O
2013-11-27	15	85	20	L4	P
2013-11-27	15	85	21	L4	P
2013-11-27	15	87	1	YA	O	0	0	0
2013-11-27	15	87	2	L4	O
2013-11-27	15	87	3	YA	O	0	0	0
2013-11-27	15	87	4	YA	O	0	0	0
2013-11-27	15	87	5	L4	O
2013-11-27	15	87	6	YA	O	0	0	0
2013-11-27	15	87	7	L4	P
2013-11-27	15	87	8	YA	O	0	0	0
2013-11-27	15	87	9	L4	O
2013-11-27	15	87	10	YA	O	0	0	0
2013-11-27	15	87	11	L4	P
2013-11-27	15	87	12	YA	O	0	0	0
2013-11-27	15	87	13	YA	O	0	0	0
2013-11-27	15	87	14	M	O	0	0	0
2013-11-27	15	87	15	YA	O	1	0	0
2013-11-27	15	87	16	M	O	0	0	0
2013-11-27	15	87	17	L4	O
2013-11-27	15	87	18	L4	O
2013-11-27	15	87	19	YA	O	0	0	0
2013-11-27	15	87	20	M	O	0	0	0
2013-11-27	15	87	21	L4	O
2013-11-27	15	87	22	M	O	0	0	0
2013-11-27	15	87	23	YA	O	0	0	0
2013-11-27	15	87	24	YA	O	0	0	0
2013-11-27	15	89	1	YA		0	0	0
2013-11-27	15	89	2	YA		0	0	0
2013-11-27	15	89	3	YA		0	0	0
2013-11-27	15	89	4	YA		2	0	3
2013-11-27	15	89	5	YA			0	1
2013-11-27	15	89	6	YA			0	0
2013-11-27	15	89	7	YA		0	0	0
2013-11-27	15	89	8	YA		3	1	3
2013-11-27	15	89	9	YA		0	0	0
2013-11-27	15	89	10	YA		2	0	2
2013-11-27	15	89	11	YA		0	0	0
2013-11-27	15	89	12	YA		0	0
2013-11-27	15	89	13	YA		0	0	0
2013-11-27	15	89	14	YA		0	0	0
2013-11-27	15	89	15	YA		0	0	0
2013-11-27	15	89	16	YA		0	0	0
2013-11-27	15	89	17	YA		2	0	2
2013-11-27	15	89	18	YA		0	0	0
2013-11-27	15	89	19	YA		0	0	0
2013-11-27	15	89	20	YA		0	0	0
2013-11-27	15	89	21	YA		0	0	0
2013-11-27	15	89	22	YA		0	0
2013-11-27	15	89	23	YA		0	0	0
2013-11-27	15	89	24	YA		0	0	0
2013-11-27	15	89	25	YA		0	0	0
2013-11-27	15	89	26	YA		0	0	0
2013-11-27	15	91	1	YA		4	0	4
2013-11-27	15	91	2	YA		3	0	3
2013-11-27	15	91	3	YA		2	0	2
2013-11-27	15	91	4	YA		0	0	0
2013-11-27	15	91	5	YA		0	0	0
2013-11-27	15	91	6	YA		3	0	1
2013-11-27	15	91	7	YA			0	2
2013-11-27	15	91	8	YA		1	0	0
2013-11-27	15	91	9	YA		2	0	2
2013-11-27	15	91	10	YA		1	0	0
2013-11-27	15	91	11	YA		2	0	2
2013-11-27	15	91	12	YA		2	0	2
2013-11-27	15	91	13	YA		0	2	3
2013-11-27	15	91	14	YA		3	0
2013-11-27	15	91	15	YA		0	0	0
2013-11-27	15	91	16	YA		0	0	0
2013-11-27	15	91	17	YA		0	0	0
2013-11-27	15	91	18	YA		4	0	5
2013-11-27	15	91	19	YA		3	1	3
2013-11-27	15	91	20	YA		0	0	0
2013-11-27	15	91	21	YA		2	0	0
2013-11-27	15	91	22	YA			0	1
2013-11-27	15	91	23	YA		1	0	0
2013-11-27	15	93	1	YA		2	0	1
2013-11-27	15	93	2	YA		4	0	3
2013-11-27	15	93	3	YA		2	0	1
2013-11-27	15	93	4	YA		4	0	2
2013-11-27	15	93	5	YA		1	0	2
2013-11-27	15	93	6	YA		3	0	3
2013-11-27	15	93	7	YA		3	1	3
2013-11-27	15	93	8	YA		0	0	0
2013-11-27	15	93	9	YA		2	0	0
2013-11-27	15	93	10	YA		3	3	3
2013-11-27	15	93	11	YA		4	1	3
2013-11-27	15	93	12	YA		3	0	4
2013-11-27	15	93	13	YA		3	0	3
2013-11-27	15	93	14	YA		3	0	3
2013-11-27	15	93	15	YA		2	0	2
2013-11-27	15	93	16	YA		3	1	4
2013-11-27	15	93	17	YA		2	0
2013-11-27	15	93	18	YA		3	0
2013-11-27	15	93	19	YA		2	0	2
2013-11-27	15	93	20	YA			0	0
2013-11-27	15	93	21	YA		4	3	3
2013-11-27	15	93	22	YA		4	0	3
2013-11-27	15	93	23	YA		2	0	2
2013-11-27	15	93	24	YA		3	1	3
2013-11-27	15	93	25	YA		1	0	1
2013-11-27	15	95	1	YA		2	0	2
2013-11-27	15	95	2	YA		3	0	2
2013-11-27	15	95	3	YA		4	0	3
2013-11-27	15	95	4	YA		0	0	0
2013-11-27	15	95	5	YA		3	1	3
2013-11-27	15	95	6	YA		4	0	3
2013-11-27	15	95	7	YA		4	3	2
2013-11-27	15	95	8	YA		1	0	0
2013-11-27	15	95	9	YA		3	0	3
2013-11-27	15	95	10	YA		3	0	3
2013-11-27	15	95	11	YA		2	3	4
2013-11-27	15	95	12	YA		2	0	1
2013-11-27	15	95	13	YA		0	0	0
2013-11-27	15	95	14	YA		3	2	2
2013-11-27	15	95	15	YA		3	0	3
2013-11-27	15	95	16	YA		1	0	1
2013-11-27	15	95	17	YA		1	0	1
2013-11-27	15	95	18	YA		1	0	0
2013-11-27	15	95	19	YA		0	0	0
2013-11-27	15	95	20	YA		3	1	3
2013-11-27	15	95	21	YA		0	0	0
2013-11-27	15	95	22	YA		0	0	0
2013-11-27	15	95	23	YA		2	0	1
2013-12-13	15	81	1	L4	P
2013-12-13	15	81	2	L4	O
2013-12-13	15	81	3	YA	O	0	0	0
2013-12-13	15	81	4	L4	P
2013-12-13	15	81	5	L4	P
2013-12-13	15	81	6	L4	O
2013-12-13	15	81	7	L4	P
2013-12-13	15	81	8	L4	P
2013-12-13	15	81	9	YA	O	0	0	0
2013-12-13	15	81	10	L4	O
2013-12-13	15	81	11	L4	P
2013-12-13	15	81	12	L4	O
2013-12-13	15	81	13	L4	P
2013-12-13	15	81	14	L4	O
2013-12-13	15	81	15	L4	O
2013-12-13	15	81	16	L4	P
2013-12-13	15	81	17	L4	O
2013-12-13	15	81	18	L4	P
2013-12-13	15	81	19	L4	P
2013-12-13	15	81	20	L4	P
2013-12-13	15	81	21	L4	P
2013-12-13	15	81	22	M	O
2013-12-13	15	81	23	L4	P
2013-12-13	15	83	1	L4	P
2013-12-13	15	83	2	L4	P
2013-12-13	15	83	3	L4	P
2013-12-13	15	83	4	YA	O	0	0	0
2013-12-13	15	83	5	L4	O
2013-12-13	15	83	6	L4	O
2013-12-13	15	83	7	L4	P
2013-12-13	15	83	8	YA	O	0	0	0
2013-12-13	15	83	9	YA	O	0	0	0
2013-12-13	15	83	10	L4	P
2013-12-13	15	83	11	L4	P
2013-12-13	15	83	12	L4	P
2013-12-13	15	83	13	L4	P
2013-12-13	15	83	14	L4	P
2013-12-13	15	83	15	L4	P
2013-12-13	15	83	16	L4	P
2013-12-13	15	83	17	YA	O	0	0	0
2013-12-13	15	83	18	L4	P
2013-12-13	15	83	19	L4	O
2013-12-13	15	83	20	L4	P
2013-12-13	15	83	21	L4	O
2013-12-13	15	83	22	YA	O	0	0	0
2013-12-13	15	83	23	L4	P
2013-12-13	15	83	24	L4	P
2013-12-13	15	83	25	YA	O	0	0	0
2013-12-13	15	83	26	L4	P
2013-12-13	15	85	1	YA		1	0	0
2013-12-13	15	85	2	YA		0	0	0
2013-12-13	15	85	3	YA		0	0	0
2013-12-13	15	85	4	L4	O
2013-12-13	15	85	5	L4	P
2013-12-13	15	85	6	YA		0	0	0
2013-12-13	15	85	7	YA		0	0	0
2013-12-13	15	85	8	YA		1	0	0
2013-12-13	15	85	9	YA		0	0	0
2013-12-13	15	85	10	YA		0	0	0
2013-12-13	15	85	11	YA		0	0	0
2013-12-13	15	85	12	YA		0	0	0
2013-12-13	15	85	13	L4	O
2013-12-13	15	85	14	YA		0	0	0
2013-12-13	15	85	15	YA		0	0	0
2013-12-13	15	85	16	L4	O
2013-12-13	15	85	17	L4	P
2013-12-13	15	85	18	L4	O
2013-12-13	15	85	19	YA		0	0	0
2013-12-13	15	85	20	YA		1	0	0
2013-12-13	15	85	21	YA		4	0	3
2013-12-13	15	85	22	YA		0	0	0
2013-12-13	15	85	23	YA		0	0	0
2013-12-13	15	85	24	YA		0	0	0
2013-12-13	15	85	25	YA		0	0	0
2013-12-13	15	87	1	YA		0	0
2013-12-13	15	87	2	YA			0	0
2013-12-13	15	87	3	YA		0	0	0
2013-12-13	15	87	4	YA		2	0	2
2013-12-13	15	87	5	YA		0	0	0
2013-12-13	15	87	6	YA		0	0	0
2013-12-13	15	87	7	YA		0	0	0
2013-12-13	15	87	8	L4	P
2013-12-13	15	87	9	L4	P
2013-12-13	15	87	10	YA		0	0	0
2013-12-13	15	87	11	YA			0	0
2013-12-13	15	87	12	YA		0	0	0
2013-12-13	15	87	13	YA		0	0	0
2013-12-13	15	87	14	YA		0	0	0
2013-12-13	15	87	15	YA		0	0	0
2013-12-13	15	87	16	YA		1	0
2013-12-13	15	87	17	YA		0	0	0
2013-12-13	15	87	18	L4	P
2013-12-13	15	87	19	L4	P
2013-12-13	15	87	20	YA		3	0	2
2013-12-13	15	87	21	YA		0	0	0
2013-12-13	15	87	22	L4	P
2013-12-13	15	87	23	YA		0	0	0
2013-12-13	15	87	24	YA		0	0	0
2013-12-13	15	87	25	YA		0	0	0
2013-12-13	15	89	1	YA		0	0	0
2013-12-13	15	89	2	YA		1	0
2013-12-13	15	89	3	L4	P
2013-12-13	15	89	4	YA		0	0	0
2013-12-13	15	89	5	YA		0	0	0
2013-12-13	15	89	6	YA		0	0
2013-12-13	15	89	7	YA		2	0	1
2013-12-13	15	89	8	YA		2	0	1
2013-12-13	15	89	9	YA		0	0	0
2013-12-13	15	89	10	YA		2	0	2
2013-12-13	15	89	11	YA		2	0	0
2013-12-13	15	89	12	YA		1	0	0
2013-12-13	15	89	13	YA		0	0	0
2013-12-13	15	89	14	YA		0	0	0
2013-12-13	15	89	15	YA		0	0	0
2013-12-13	15	89	16	YA		0	0	0
2013-12-13	15	89	17	YA		0	0	0
2013-12-13	15	89	18	YA		2	0	0
2013-12-13	15	89	19	YA		0	0	0
2013-12-13	15	89	20	YA		1	0	0
2013-12-13	15	89	21	YA		0	0	0
2013-12-13	15	89	22	YA		2	0	0
2013-12-13	15	89	23	YA		3	0	2
2013-12-13	15	89	24	YA		2	0	2
2013-12-13	15	89	25	YA		0	0	0
2013-12-13	15	91	1	YA		3	0	3
2013-12-13	15	91	2	YA			0	2
2013-12-13	15	91	3	YA		0	0	0
2013-12-13	15	91	4	YA		0	0	0
2013-12-13	15	91	5	YA		3	0	3
2013-12-13	15	91	6	YA			0	3
2013-12-13	15	91	7	YA			0	0
2013-12-13	15	91	8	YA		3	0	3
2013-12-13	15	91	9	YA		0	0	0
2013-12-13	15	91	10	YA		2	0	0
2013-12-13	15	91	11	YA		2	0	1
2013-12-13	15	91	12	YA		2	2	3
2013-12-13	15	91	13	YA		4	0
2013-12-13	15	91	14	YA		2	0	2
2013-12-13	15	91	15	YA		2	0	1
2013-12-13	15	91	16	YA		4	0	3
2013-12-13	15	91	17	YA		3	0
2013-12-13	15	91	18	YA		0	0	0
2013-12-13	15	91	19	YA		3	0	3
2013-12-13	15	91	20	YA			0	0
2013-12-13	15	91	21	YA		3	0
2013-12-13	15	91	22	YA		2	0	2
2013-12-13	15	91	23	YA			0	0
2013-12-13	15	93	1	YA		4	0	3
2013-12-13	15	93	2	YA		3	0	2
2013-12-13	15	93	3	YA		4	0	3
2013-12-13	15	93	4	YA		3	1
2013-12-13	15	93	5	YA		3	0	2
2013-12-13	15	93	6	YA		2	0	1
2013-12-13	15	93	7	YA		3	1	3
2013-12-13	15	93	8	YA		3	0	3
2013-12-13	15	93	9	YA		3	0	3
2013-12-13	15	93	10	YA		2	0	0
2013-12-13	15	93	11	YA		1	0	2
2013-12-13	15	93	12	YA		1	0	0
2013-12-13	15	93	13	YA		2	0	2
2013-12-13	15	93	14	YA		2	0	2
2013-12-13	15	93	15	YA		3	2	4
2013-12-13	15	93	16	YA		2	2	2
2013-12-13	15	93	17	YA		2	0	2
2013-12-13	15	93	18	YA		3	2	3
2013-12-13	15	93	19	YA		3	1
2013-12-13	15	93	20	YA		1	0	0
2013-12-13	15	93	21	YA		3	0	3
2013-12-13	15	93	22	YA			0	3
2013-12-13	15	93	23	YA		2	0	0
2013-12-13	15	93	24	YA			0	3
2013-12-13	15	93	25	YA		3	0	4
2013-12-13	15	95	1	YA		3	1	3
2013-12-13	15	95	2	YA		4	0	3
2013-12-13	15	95	3	YA		3	0	2
2013-12-13	15	95	4	YA		3	2	2
2013-12-13	15	95	5	YA		3	3	3
2013-12-13	15	95	6	YA		3	2	3
2013-12-13	15	95	7	YA		4	4	3
2013-12-13	15	95	8	YA		3	0	2
2013-12-13	15	95	9	YA		3	1	3
2013-12-13	15	95	10	YA		1	0	0
2013-12-13	15	95	11	YA		3	3	3
2013-12-13	15	95	12	YA		2	0	2
2013-12-13	15	95	13	YA		2	3	3
2013-12-13	15	95	14	YA		2	0	2
2013-12-13	15	95	15	YA		3	3	3
2013-12-13	15	95	16	YA		3	2	4
2013-12-13	15	95	17	YA			0	2
2013-12-13	15	95	18	YA		3	5	3
2013-12-13	15	95	19	YA		2	2	3
2013-12-13	15	95	20	YA		2	2	3
2013-12-13	15	95	21	YA		3	0	3
2013-12-13	15	95	22	YA		3	1	2
2013-12-13	15	95	23	YA		3	0	0
2013-12-13	15	95	24	YA		3	0	2

## Sheet: Notes
Order	Date	Raise	Low Temp	High Temp
1	2012-07-19	25	25.4	25.8
2	2013-04-03	25	25.1	25.6
4	2013-11-15	25	24.9	25.5
5	2013-11-25	25	25	25.7
3	2013-04-06	15	14.8	15.2
6	2013-11-27	15	15.2	15.7
7	2013-12-13	15	15.2	15.7
8	2015-02-09	20
