# Supplementary material for: Experience Modulates the Reproductive Response to Heat Stress in C. elegans via Multiple Physiological Processes
Source: PLoS One. 2015 Dec 29;10(12):e0145925. doi: 10.1371/journal.pone.0145925 (PMC4699941; doi:10.1371/journal.pone.0145925)
Supplement: S5 Fig — (A, B) Individual trials (each with n = 25) for the recovery results reported in Fig 5A and 5B. (C) Brood sizes of recovered individuals raised at 15°C (blue) or 25°C (red) increased when fresh males were added during recovery from stress at 29°C. Black lines represent median values. Box hinges represent the first and third quartiles of the data. Each whisker extends to the furthest data point within 1.5 × IQR (inter-quartile range) of its nearest hinge. (PDF) [file pone.0145925.s005.pdf]

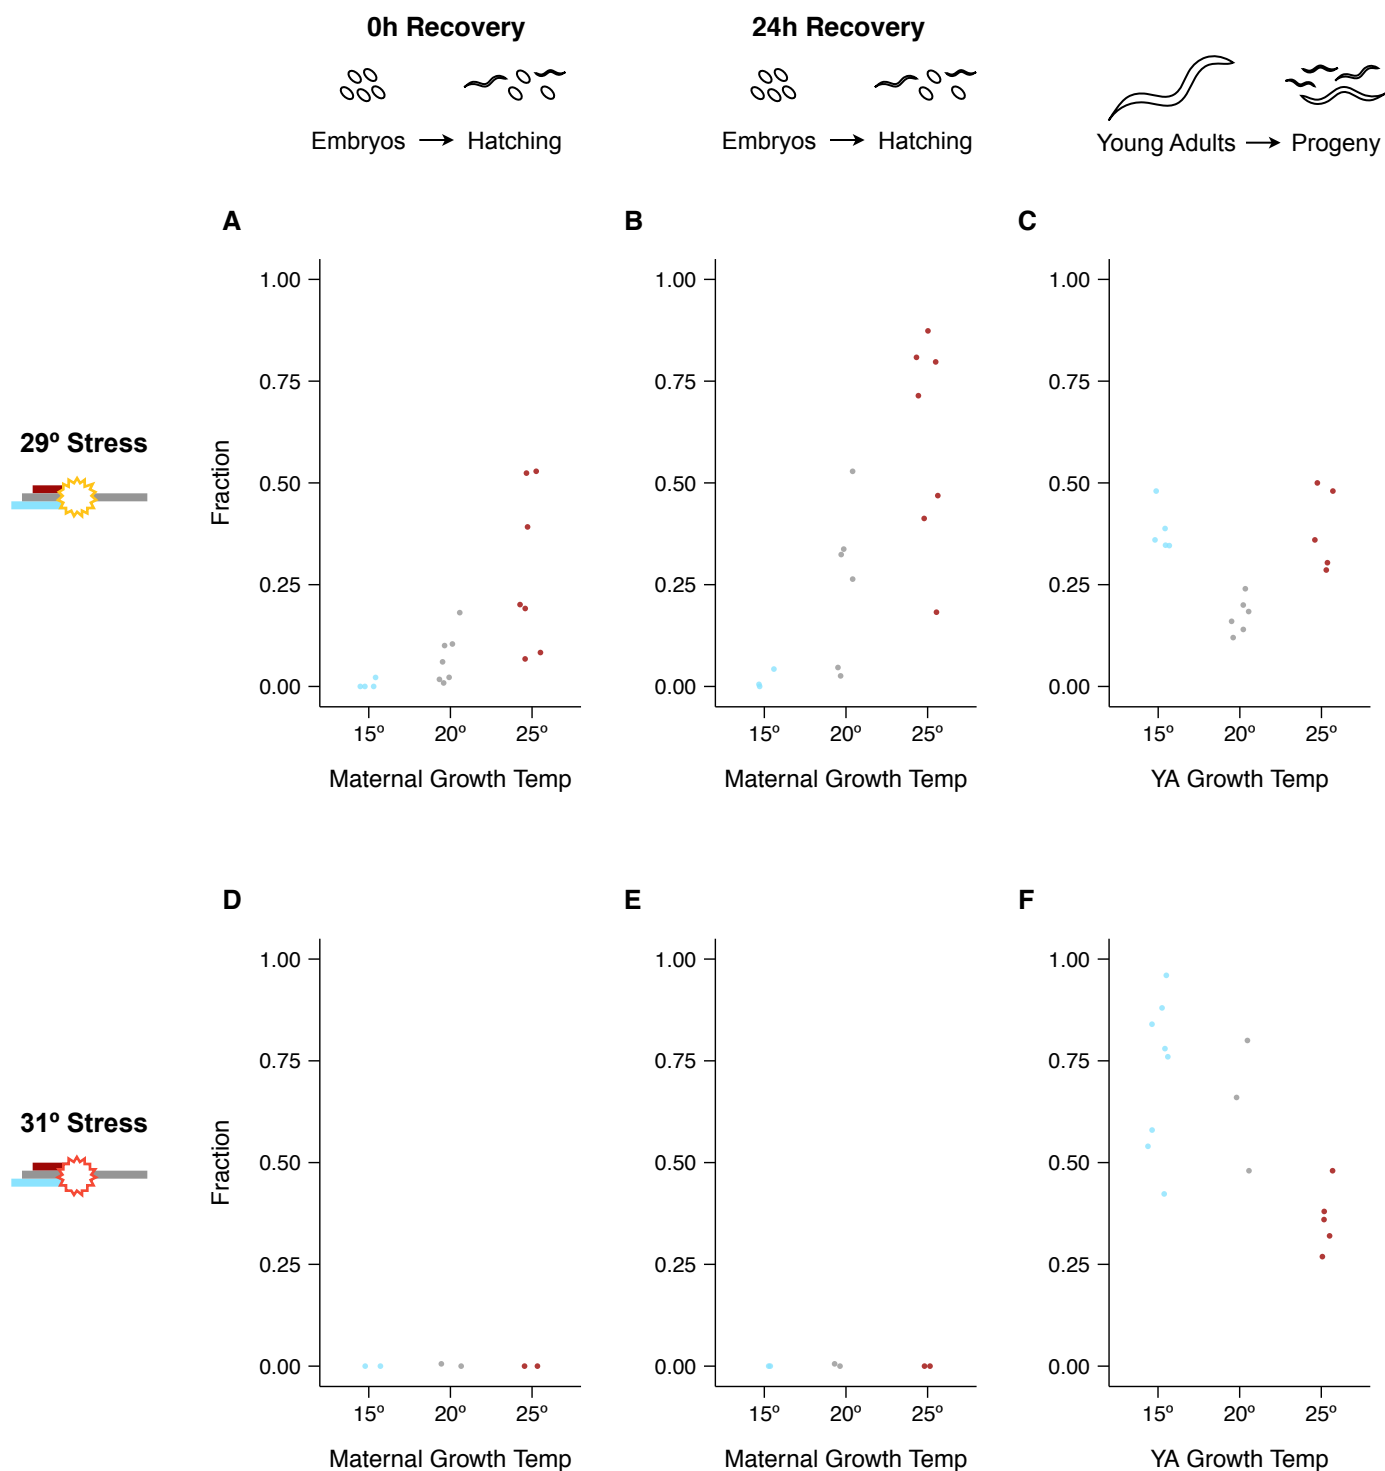

**S5 Fig. Reproductive performance after 29°C and 31°C heat stress.** (A, D) Individual trials (each with  $47 \leq n \leq 279$ ) for the hatching results reported in Fig. 4A and 4D. (B, E) Hatching fraction increases after 24 hours of recovery from 29°C but not 31°C heat stress. (C, F) Individual trials (each with  $n = 25$  or  $n = 50$ ) for the recovery results reported in Figure 4B and 4E. See S3 Table for raw data.
